# Supplementary material for: Environmental stresses inhibit splicing in the aquatic fungus Blastocladiella emersonii
Source: PubMed Central journal article supplement (PMC2773782; doi:10.1186/1471-2180-9-231), 2009-10-29
Supplement: 1471-2180-9-231-S1.pdf [file 1471-2180-9-231-S1.pdf]

**Supplemental Table 1** – *B. emersonii* genes corresponding to iESTs sequenced from stress cDNA libraries.

| Gene ID        | Annotation                                  | 5' SS    | Branch site | 3' SS    | # of iESTs |     |     | Length (bp) | Biological process (GO)                   | # of ESTs (no intron) |
|----------------|---------------------------------------------|----------|-------------|----------|------------|-----|-----|-------------|-------------------------------------------|-----------------------|
|                |                                             |          |             |          | CDM        | CDC | HSR |             |                                           |                       |
| BeSAS691*      | 6-pyruvoyltetrahydropterin synthase         | G 'gtatg | cctcac      | gacag' G | -          | 5   | -   | 132         | amino acid metabolism                     |                       |
| BeSAS582       | Hypothetical protein                        | G 'gtacg | tctgac      | cgcag' C | -          | 2   | -   | 205         | carbohydrate biosynthesis                 |                       |
| BeE90D08B09    | Chitinase                                   | A 'gtacg | actgac      | tgtag' C | -          | 1   | -   | 70          | carbohydrate metabolism                   | 15                    |
| BeE90D04F01    | Septin 2                                    | C 'gtacg | gctgac      | cgcag' A | -          | 1   | -   | 71          | cell cycle                                | 2                     |
| BeE60C05G05    | Beta tubulin cofactor A                     | T 'gtgcg | gctcac      | cgtag' T | 1          | -   | -   | 58          | chaperonin-mediated tubulin folding       |                       |
| BeE60C12H07    | Prenylcysteine carboxylmethyltransferase    | T 'gtccg | gctgac      | tctag' C | 1          | -   | -   | 79          | C-terminal protein amino acid methylation |                       |
| BeSAS333*      | Dynein light chain                          | G 'gtgcg | actcat      | tgtag' A | 2          | 1   | -   | 63          | dendrite morphogenesis                    |                       |
| BeSAS327(1)*   | Thioredoxin II                              | C 'gtacg | gctaac      | accag' G | 4          | 3   | -   | 168         | electron transport                        | 8                     |
| BeSAS327(2)    | Thioredoxin II                              | C 'gtacg | actcac      | accag' G | 4          | 3   | -   | 70          | electron transport                        | 8                     |
| BeE90D04B07*   | Thioredoxin domain                          | G 'gtgcg | gctgac      | tatag' C | -          | 1   | -   | 57          | electron transport                        |                       |
| BeE60C34B08    | Hypothetical protein                        | G 'gtact | actgac      | tgtag' G | 1          | -   | -   | 79          | ER-associated protein catabolism          | 5                     |
| BeE90D12B01(1) | Glycolipid transfer protein                 | G 'gtccg | actgac      | tgtag' A | -          | 1   | -   | 62          | glycolipid transport                      | 2                     |
| BeE90D12B01(2) | Glycolipid transfer protein                 | G 'gtacg | gctgac      | tgtag' C | -          | 1   | -   | 64          | glycolipid transport                      | 2                     |
| BeE60H21C11*   | Rab12a protein                              | A 'gtacg | gctgac      | cgtag' C | -          | -   | 1   | 75          | intracellular protein transport           |                       |
| BeSAS509       | Ferritin                                    | G 'gtgcg | gctaac      | tacag' G | 2          | 2   | -   | 71          | iron ion homeostasis                      | 32                    |
| BeSAS590(1)    | Dynein light chain 2                        | C 'gtacg | gctcac      | tgtag' A | -          | 2   | -   | 76          | microtubule-based process                 | 11                    |
| BeSAS590(2)    | Dynein light chain 2                        | G 'gtacg | actgac      | ctgag' C | -          | 2   | -   | 200         | microtubule-based process                 | 11                    |
| BeSAS605       | Methyltransferase                           | C 'gtacg | gctgac      | tgtag' C | -          | 2   | -   | 64          | phospholipid metabolism                   | 3                     |
| BeE60C07D01*   | Hypothetical protein                        | G 'gtacc | gctaac      | catag' G | 1          | -   | -   | 63          | phospholipid metabolism                   |                       |
| BeE60C23G07    | Tyrosine phosphatase                        | T 'gtatg | cctcac      | cgtag' G | 1          | -   | -   | 61          | protein amino acid dephosphorylation      |                       |
| BeSAS395*      | 50S ribosomal protein L28                   | C 'gtgag | actgac      | cctag' T | 1          | -   | 2   | 57          | protein biosynthesis                      |                       |
| BeSAS407*      | Hsp70-1                                     | G 'gtacg | gctcac      | tctag' A | 1          | 1   | -   | 165         | protein folding                           | 12                    |
| BeSAS726*      | Hsp60                                       | G 'gttcg | actaat      | tgtag' C | -          | 2   | -   | 69          | protein folding                           |                       |
| BeSAS568*      | Hsp30                                       | G 'gtacg | actcac      | cgtag' A | 2          | 1   | -   | 69          | protein folding                           | 20                    |
| BeSAS762*      | Hsp17                                       | A 'gtacg | actcac      | tcag' A  | 1          | 3   | -   | 96          | protein folding                           | 167                   |
| BeE90D15G01(1) | Hsp16                                       | G 'gtgcg | actgac      | tcag' G  | -          | 1   | -   | 65          | protein folding                           | 8                     |
| BeE90D15G01(2) | Hsp16                                       | G 'gtatg | cctaac      | ctcag' A | -          | 1   | -   | 102         | protein folding                           | 8                     |
| BeE60H23F12    | Cyclophilin D                               | G 'gtacg | actgac      | gacag' G | -          | -   | 1   | 65          | protein folding                           | 18                    |
| BeE60C1408(1)* | Cyclophilin A                               | G 'gtccg | actcac      | tgtag' C | 1          | -   | -   | 135         | protein folding                           |                       |
| BeE60C1408(2)* | Cyclophilin A                               | G 'gtacg | catcac      | ggaag' A | 1          | -   | -   | 252         | protein folding                           | 35                    |
| BeE90D07F08(3) | Cyclophilin A                               | G 'gtacg | gttgac      | tcggg' G | -          | 1   | -   | 103         | protein folding                           | 35                    |
| BeSAS476(1)    | Peptidil prolyl cis-trans isomerase (FK506) | G 'gtggg | actcac      | tctag' G | 2          | -   | -   | 169         | protein folding                           | 10                    |
| BeSAS476(2)*   | Peptidil prolyl cis-trans isomerase (FK506) | G 'gtgcg | tctgac      | tctag' G | 2          | -   | -   | 78          | protein folding                           | 10                    |
| BeSAS21        | Prohibitin                                  | G 'gtggg | atcaac      | tctag' T | -          | 2   | 1   | 70          | protein folding                           |                       |
| BeE60C35D10(1) | Hypothetical protein                        | G 'gtaca | ctcaac      | cgtag' A | 1          | -   | -   | 62          | protein modification                      |                       |

|                |                                                |          |        |          |   |   |   |     |                                            |    |
|----------------|------------------------------------------------|----------|--------|----------|---|---|---|-----|--------------------------------------------|----|
| BeE60C35D10(2) | Hypothetical protein                           | T 'gtaca | cctgac | tgtag' G | 1 | - | - | 59  | protein modification                       |    |
| BeSAS143*      | Ubiquitin-conjugating enzyme                   | G 'gtacg | actgac | cgtag' A | - | 1 | 2 | 72  | protein modification                       |    |
| BeE60C10A07    | Hypothetical protein                           | G 'gtgcg | actcac | cgtag' T | 1 | - | - | 68  | protein modification                       | 9  |
| BeSAS589(1)    | 26S proteasome regulatory complex subunit p37A | G 'gtacg | cctgac | accag' G | - | 2 | - | 65  | proteolysis                                |    |
| BeSAS589(2)    | 26S proteasome regulatory complex subunit p37A | C 'gtatg | actgac | tgtag' A | - | 2 | - | 64  | proteolysis                                |    |
| BeE60C19E02    | ENSANG00000022234                              | G 'gtacg | tctcac | aacag' T | 1 | - | - | 61  | regulation of transcription, DNA-dependent |    |
| BeSAS714       | Glutathione Peroxidase                         | G 'gtgag | gctaac | gtcag' C | 2 | 2 | 1 | 334 | response to oxidative stress               | 20 |
| BeSAS517       | GTP cyclohydrolase II                          | G 'gtgcg | cctcac | accag' A | 2 | 3 | - | 65  | riboflavin biosynthesis                    |    |
| BeE60C09G12*   | mitochondrial phosphate carrier protein (Mir1) | A 'ctggt | gttgac | cgtag' C | 1 | - | - | 108 | transport                                  |    |
| BeE60C15F01    | NTF2-related export protein 2                  | G 'gtacg | actcac | tccag' T | 1 | - | - | 56  | transport                                  |    |
| BeE60H21G06*   | Nuclear transport factor 2 (ntf-2)             | C 'gtacg | gcttac | tgtag' C | - | - | 1 | 57  | transport                                  | 8  |
| BeSAS199       | Hypothetical protein                           | G 'gtacc | gctgac | tgtag' G | 1 | 1 | 2 | 107 | ubiquitin-dependent protein catabolism     |    |
| BeSAS813(1)*   | Ubiquitin fusion degradation protein           | C 'gtgtg | tcttac | tgtag' T | - | 2 | - | 63  | ubiquitin-dependent protein catabolism     |    |
| BeSAS813(2)    | Ubiquitin fusion degradation protein           | G 'gtgcg | gctgac | actag' T | - | 2 | - | 62  | ubiquitin-dependent protein catabolism     |    |
| BeSAS435       | Synaptobrevin                                  | G 'gtcgg | gctcac | tgtag' C | 2 | - | - | 155 | vesicle-mediated transport                 |    |
| BeSAS548(1)    | Synaptobrevin-like V-snare protein             | C 'gtacg | gctgac | cgcag' C | 2 | - | 1 | 65  | vesicle-mediated transport                 |    |
| BeSAS548(2)    | Synaptobrevin-like V-snare protein             | G 'gtgcg | gctcac | cacag' A | 2 | - | 1 | 64  | vesicle-mediated transport                 |    |
| BeSAS224       | Hypothetical protein                           | G 'gtacg | ctgaac | cacag' G | - | 2 | 2 | 67  |                                            |    |
| BeSAS239*      | No match                                       | T 'gtccg | actgac | tgtag' C | - | 1 | 2 | 81  |                                            |    |
| BeSAS305*      | No match                                       | G 'gtacg | acatac | tctag' T | - | - | 2 | 63  |                                            |    |
| BeSAS377(1)    | Hypothetical protein                           | G 'gtacg | actgac | cacag' A | 1 | 1 | - | 64  |                                            |    |
| BeSAS377(2)    | Hypothetical protein                           | G 'gtacg | actgac | tgtag' T | 1 | 1 | - | 65  |                                            |    |
| BeSAS377(3)    | Hypothetical protein                           | G 'gtacg | gctgat | tgtag' A | 1 | 1 | - | 62  |                                            |    |
| BeSAS421*      | Putative elicitor-responsive gene              | G 'gtacg | tctcac | tctag' T | 2 | - | - | 72  |                                            | 2  |
| BeSAS428       | Putative pirin-like protein                    | G 'gtacg | gctcac | tctag' A | 2 | 6 | - | 73  |                                            | 27 |
| BeSAS442*      | Peroxiredoxins                                 | G 'gtacg | gctcac | actag' G | 2 | - | - | 120 |                                            | 54 |
| BeSAS468(1)    | No match                                       | C 'gtacg | gctcac | ttcag' A | 2 | - | - | 253 |                                            |    |
| BeSAS468(2)    | No match                                       | G 'gtgtg | tctgac | tgtag' C | 2 | - | - | 64  |                                            |    |
| BeSAS492       | No match                                       | G 'gtgcg | ccgcat | cccag' G | 1 | - | 1 | 164 |                                            |    |
| BeSAS584(1)    | No match                                       | G 'gtatg | gctcac | tctag' C | - | 2 | - | 100 |                                            |    |
| BeSAS584(2)    | No match                                       | G 'gtacg | gctcac | cacag' A | - | 2 | - | 65  |                                            |    |
| BeSAS585       | Hypothetical protein                           | G 'gtgcg | gctgac | tgtag' G | 2 | 3 | 3 | 67  |                                            |    |
| BeSAS630*      | No match                                       | G 'gtacg | gctaac | cgcag' A | 1 | 1 | 3 | 93  |                                            |    |
| BeSAS638(1)    | No match                                       | G 'gtatg | gctcac | cacag' A | 1 | 3 | - | 65  |                                            |    |
| BeSAS638(2)    | No match                                       | G 'gtgcg | gctgac | tgtag' C | 1 | 3 | - | 64  |                                            |    |
| BeSAS653       | Zn-dependent alcohol dehydrogenase             | G 'gtacg | gctaac | tgtag' G | - | 5 | - | 67  |                                            |    |
| BeSAS735       | Microsomal glutathione S-transferase 3         | G 'gtact | actgac | ggtag' C | 2 | 1 | - | 77  |                                            | 14 |

|                 |                                               |          |         |          |   |   |   |     |    |
|-----------------|-----------------------------------------------|----------|---------|----------|---|---|---|-----|----|
| BeSAS792        | Membrane bound C2 domain containing protein   | G 'gtgcg | gctgac  | cgtag' T | 2 | 1 | - | 83  | 6  |
| BeSAS802        | No match                                      | C 'gtacg | gctcac  | ttcag' A | 2 | 2 | 3 | 253 | 2  |
| BeSAS814        | Microsomal glutathione S-transferase 3        | G 'gtacg | gctaac  | cctag' G | - | 2 | - | 67  | 8  |
| BeE60C10A05(1)* | No match                                      | G 'gtacg | gctcac  | cgtag' C | 1 | - | - | 186 |    |
| BeE60C10A05(2)* | No match                                      | G 'gtacg | acttac  | tctag' T | 1 | - | - | 63  |    |
| BeE60C10E09     | RNA binding protein                           | G 'gtacg | gcgggac | aacag' G | 1 | - | - | 59  | 3  |
| BeE60C11C05(1)* | Hypothetical protein                          | G 'gtaca | gttgac  | tttag' C | 1 | - | - | 72  |    |
| BeE60C11C05(2)  | Hypothetical protein                          | G 'gtacg | tctgac  | tctag' A | 1 | - | - | 91  |    |
| BeE60C11F05     | Unnamed protein product                       | G 'gtgcg | actgac  | tgtag' G | 1 | - | - | 64  |    |
| BeE60C24F03     | No match                                      | C 'gtacg | cctcac  | tgtag' C | 1 | - | - | 67  |    |
| BeE60C34G12     | Hypothetical protein                          | C 'gtacg | cctgac  | tgtag' C | 1 | - | - | 61  |    |
| BeE60C35G03     | Hematopoietic cell-specific Lyn substrate 1   | C 'gtgag | gctgac  | cttag' C | 1 | - | - | 61  |    |
| BeE60C36B06(1)  | Similar to apoA1 protein                      | T 'gtccg | gctgac  | cctag' T | 1 | - | - | 92  |    |
| BeE60C36B06(2)  | Similar to apoA1 protein                      | G 'gttcg | tctgcac | tacag' G | 1 | - | - | 58  |    |
| BeE60C36B06(3)  | Similar to apoA1 protein                      | G 'gttcg | tctcac  | tgtag' G | 1 | - | - | 61  |    |
| BeE60H17C01*    | No match                                      | C 'gtacg | gctgat  | tgtag' C | - | - | 1 | 57  |    |
| BeE60H22D09     | No match                                      | T 'gtaca | actgac  | tgtag' G | - | - | 1 | 77  |    |
| BeE60H28F12     | No match                                      | G 'gtacg | gctcac  | cgtag' C | - | - | 1 | 187 |    |
| BeE60H28H03     | No match                                      | G        | gctgac  | cggcg' G | - | - | 1 | 176 |    |
| BeE60H29B06(1)  | SAM-dependent methyltransferases              | C 'gtacg | gctgac  | gtag' G  | - | - | 1 | 61  |    |
| BeE60H29B06(2)  | SAM-dependent methyltransferases              | G 'gtacg | cctgac  | tgtag' C | - | - | 1 | 59  |    |
| BeE60H31A04*    | No match                                      | G 'gtgcg | tctcac  | tctag' A | - | - | 1 | 75  |    |
| BeE90D02G03*    | Inositol-1(or 4)-monophosphatase 2 (IMPase 2) | G 'gtaag | gctgaa  | tgtag' A | - | 1 | - | 57  |    |
| BeE90D04E07*    | HSPC177]                                      | G 'gtgcg | cctcac  | tgtag' A | - | 1 | - | 63  |    |
| BeE90D05A10*    | No match                                      | G 'gtacg | acatac  | tctag' T | - | 1 | - | 63  |    |
| BeE90D07H07     | No match                                      | G 'gtagg | actcac  | ggtag' C | - | 1 | - | 53  | 2  |
| BeE90D09D10*    | Hypothetical protein                          | G 'gtatg | gctaac  | tctag' C | - | 1 | - | 243 |    |
| BeE90D11G08*    | C2 contain domain protein                     | G 'gtgcg | actgac  | tttag' T | - | 1 | - | 75  | 12 |
| BeE90D12F02     | ENSANG00000010717                             | G 'gtatg | gttgac  | tgtag' T | - | 1 | - | 61  |    |
| BeE90D15D07(1)  | GTP cyclohydrolase I                          | G 'gtacg | gctcac  | cgtag' C | - | 1 | - | 112 |    |
| BeE90D15D07(2)  | GTP cyclohydrolase I                          | G 'gtacg | actcac  | gacag' A | - | 1 | - | 79  |    |
| BeE90D16C06*    | Glutathione-S-Transferase                     | T 'gtacg | gctgac  | tctag' G | - | 1 | - | 72  | 14 |
| BeE90D17F08     | No match                                      | G 'gtaag | attcat  | accag' A | - | 1 | - | 62  |    |

The putative 5' and 3' splicing sites (SS), as well as the branch site and the intron length are shown. The biological processes in which the proteins encoded by these genes are involved are also depicted. The number of iESTs observed in each stress cDNA library (CDM, CDC or HSR) is shown. The last column indicates the number of ESTs sequenced also from stress cDNA libraries but that did not presented introns in its sequence. The numbers between parentheses indicate the number of introns observed in a same iESTs. Asterisks correspond to the ESTs that possess introns but maintain the coding frame.
