# Supplementary material for: Environmental stresses inhibit splicing in the aquatic fungus Blastocladiella emersonii
Source: PubMed Central journal article supplement (PMC2773782; doi:10.1186/1471-2180-9-231), 2009-10-29
Supplement: 1471-2180-9-231-S2.pdf [file 1471-2180-9-231-S2.pdf]

**Supplemental Table 2** – Genes encoding spliceosome proteins in *B. emersonii*, annotated in GO category “mRNA processing”.

| Gene ID      | Annotation                                                   | Categories      |
|--------------|--------------------------------------------------------------|-----------------|
| BeCSAS368    | mRNA capping enzyme                                          | Cap             |
| BeG30N18G01  | mRNA cap guanine-N7 methyltransferase                        | Cap             |
| BeE90D16F01  | mRNA capping enzyme beta subunit                             | Cap             |
| BeZSPNP17D08 | mRNA decapping enzyme 1B                                     | Cap             |
| BeE60C32G03  | LSM domain-containing protein 1                              | SM family       |
| BeCSAS1385   | U6 snRNA-associated Sm-like protein LSM4                     | SM family       |
| BeCSAS1096   | Similar to U6 snRNA-associated Sm-like protein LSM5          | SM family       |
| BeCSAS447    | Small nuclear ribonucleoprotein                              | SM family       |
| BeE60N15H01  | Small nuclear ribonucleoprotein Sm D1                        | SM family       |
| BeCSAS304    | Small nuclear ribonucleoprotein Sm D2-like protein           | SM family       |
| BeCSAS1252   | Small nuclear ribonucleoprotein Sm D3                        | SM family       |
| BeCSAS1629   | Small nuclear ribonucleoprotein Sm E                         | SM family       |
| BeCSAS1658   | Small nuclear ribonucleoprotein Sm F                         | SM family       |
| BeE60N19C01  | Small nuclear ribonucleoprotein Sm G                         | SM family       |
| BeCSAS8      | Sm-like protein                                              | SM family       |
| BeCSAS2475   | SnRNP core protein SMX5d - Lsm2                              | SM family       |
| BeG120N01F07 | Peptidyl-prolyl isomerase Cwc27                              | Splicing factor |
| BeE30N19E11* | Pre-mRNA-splicing factor Cwc2                                | Splicing factor |
| BeE60N18G11  | Pre-mRNA-splicing factor Cwc26                               | Splicing factor |
| BeCSAS558    | Pre-mRNA-splicing factor Isy1                                | Splicing factor |
| BeE30N13A04  | Pre-mRNA-splicing factor Prp45                               | Splicing factor |
| BeCSAS513    | Pre-mRNA-splicing factor Prp46                               | Splicing factor |
| BeE90N10F12  | Pre-mRNA-splicing factor Rse1                                | Splicing factor |
| BeCSAS750    | Pre-mRNA-splicing factor Syf2                                | Splicing factor |
| BeE90D04E05  | Probable pre-mRNA splicing factor Prp1                       | Splicing factor |
| BeCSAS813    | Putative splicing factor                                     | Splicing factor |
| BeE60N02E02  | Splicing factor 3B subunit 2                                 | Splicing factor |
| BeCSAS1462   | Splicing factor 3B subunit 5                                 | Splicing factor |
| BeG90N18H03  | Splicing factor 3B subunit 3                                 | Splicing factor |
| BeCSAS2344*  | Cleavage and polyadenylation specificity factor 5            |                 |
| BeE60N07A04  | Cleavage stimulation factor, 3' pre-RNA                      |                 |
| BeE60N07D10  | Cleavage stimulation factor, 50 kDa subunit                  |                 |
| BeE90D03C05  | E3 ubiquitin protein ligase TOM1-like protein                |                 |
| BeCSAS2312   | SR-rich pre-mRNA splicing activator                          |                 |
| BeCSAS780    | DUF866 domain protein                                        |                 |
| BeE60H15D06  | Similar to pre-mRNA-splicing factor Prp1                     |                 |
| BeCSAS566    | RNA binding motif protein 8                                  |                 |
| BeG120N03E07 | Protein interacting with Hsp90 1 similar to yeast Nop17      |                 |
| BeE90D13G04  | Putative U5 small nuclear ribonucleoprotein 200 kDa helicase |                 |
| BeCSAS417    | U4/U6 X U5 tri-snRNP complex subunit Dim1                    |                 |
| BeCSAS1763   | WD-repeat protein Pop3                                       |                 |

Asterisks indicate the proteins that possess zinc-related domains.
