# Supplementary material for: Environmental stresses inhibit splicing in the aquatic fungus Blastocladiella emersonii
Source: PubMed Central journal article supplement (PMC2773782; doi:10.1186/1471-2180-9-231), 2009-10-29
Supplement: 1471-2180-9-231-S3.pdf [file 1471-2180-9-231-S3.pdf]

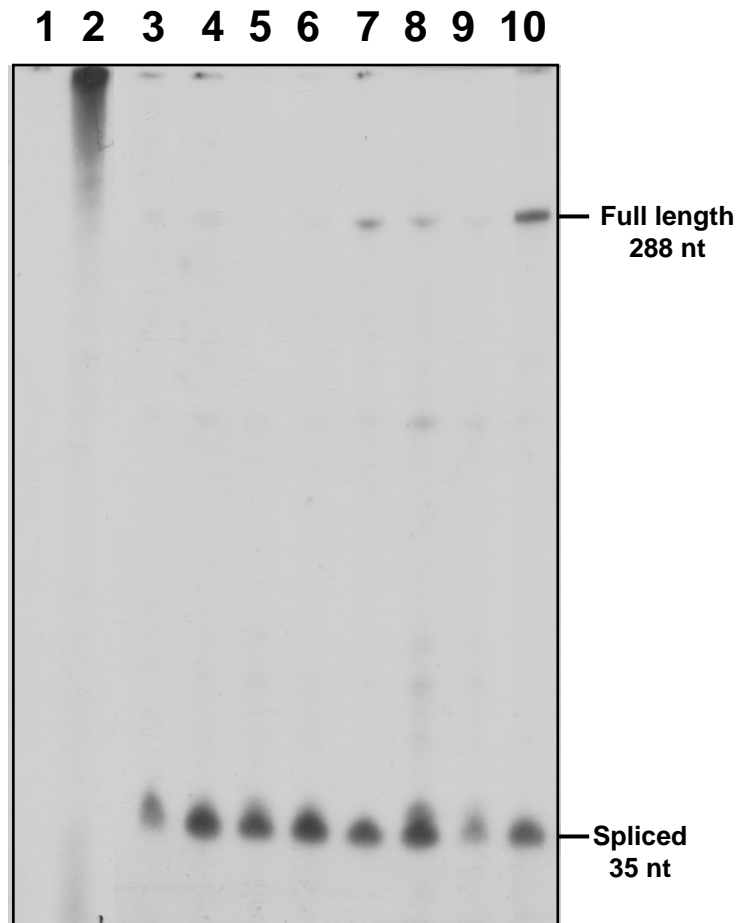

**Additional file 3:** S1 protection assays of *hsp70* mRNA in different cadmium concentrations. Protection assays were performed using a 5' end-labeled probe (the same used in Figure 3) and 50 µg of yeast tRNA in the presence or absence of S1 nuclease as control (lanes 1 and 2), 50 µg of total RNA isolated from 30 min and 60 min sporulating cells (lanes 3 and 4, respectively), cells submitted to 25 µM CdCl<sub>2</sub> for 30 min and 60 min (lanes 5 and 6, respectively), cells submitted to 50 µM CdCl<sub>2</sub> for 30 min and 60 min (lanes 7 and 8, respectively), cells submitted to 100 µM CdCl<sub>2</sub> for 30 min and 60 min (lanes 9 and 10, respectively).
